# Supplementary material for: An Oct4-Centered Protein Interaction Network in Embryonic Stem Cells
Source: PubMed Central journal article supplement (PMC2860243; doi:10.1016/j.stem.2010.02.014), 2010-04-02
Supplement: mmc1.pdf [file mmc1.pdf]

## Supplemental Information

### An Oct4-Centered Protein Interaction Network in Embryonic Stem Cells

Debbie L.C. van den Berg, Tim Snoek, Nick P. Mullin, Adam Yates, Karel Bezstarosti, Jeroen Demmers, Ian Chambers, and Raymond A. Poot

#### Inventory of Supplemental Information

#### Supplemental Experimental Procedures

#### References for Oct4 interaction network

##### **Figure S1, related to Figure 1**

Figure S1 contains additional data on the Oct4 purifications and Oct4 associated proteins and is linked to Figure 1 in the main article.

##### **Figure S2, related to Figure 2**

Figure S2 contains additional data on the purifications of F-Sall4, F-Dax1, F-Tcfcp2l1 and F-Esrrb and is linked to Figure 2 in the main article.

##### **Figure S3, related to Figure 3**

Figure S3 contains additional data on interacting proteins of Sall4, Dax1, Tcfcp2l1 and Esrrb and is linked to Figure 3 in the main article.

##### **Table S1, related to Table 1**

Table S1 contains the emPAI scores of interacting proteins in all Oct4 purifications.

##### **Tables S2 to S5, related to Figure 2**

Tables S2 to S5 contain the mascot scores and numbers of unique peptides of interacting proteins in all purifications of F-Sall4, F-Dax1, F-Tcfcp2l1 and F-Dax1, respectively.

##### **Tables S6 to S9, related to Figure 2**

Tables S6 to S9 contain the emPAI scores of interacting proteins in all purifications of F-Sall4, F-Dax1, F-Tcfcp2l1 and F-Dax1, respectively.

## Supplemental Experimental Procedures

### Antibodies used in Figures S1, S2, S3

anti-Sox2 (Y17, Santa Cruz), anti-Sall4 (PP-PPZ 0601-00, Perseus Proteomics), anti-Oct4 (C10, Santa Cruz), anti-Dax1 (sc-841, Santa Cruz), anti-Tcfcp2l1 (ARP32606, Aviva), anti-Esrrb (PP-H6707-00, R&D systems), anti-Flag (M2, Sigma), anti-Sall1 (PP-K9814-00, R&D), anti-Wdr5 (07-706, Upstate), anti-Ep400 (A300-541a, Bethyl Laboratories), anti-Lamin B1 (C20, Santa Cruz).

### Western and RT-PCR analysis of ES cell lines

Whole cell extracts of F-Oct4 ES cells, ZHBTc4 ES cells and CGR8 ES cells were analysed by western blot with the indicated antibodies. For RT-PCR analysis, RNA was purified from  $5 \times 10^6$  cells using the RNeasy protocol (Qiagen). cDNA was synthesised using 2.5 µg RNA primed with random hexamers according to the Superscript First Strand Synthesis System (Invitrogen). PCRs were performed on a Roche Lightcycler by an initial denaturation at 95°C for 5 mins, followed by 45 cycles of denaturation (95°C, 5s), annealing (58°C, 10 s) and elongation (72°C, 20 s).

### Primers used for RT-PCR analysis of ES cell lines

|                  |                          |
|------------------|--------------------------|
| TBP FW           | ggggagctgtgatgtgaagt     |
| TBP RV           | ccaggaaataattctggctca    |
| Klf4 FW          | cgggaagggagaagact        |
| Klf RV           | gacttcctcacgccaacg       |
| Zfp42 FW         | cagctcctgcacacagaaga     |
| Zfp42 RV         | actgatccgcaaacactg       |
| Eras FW          | gcccctcatcagactgctac     |
| Eras RV          | gcagctcaaggaagaggtgt     |
| Dax1 FW          | accgtgctctttaaccaga      |
| Dax1 RV          | ccggatgtgctcagtaagg      |
| Fgf5 FW          | gtttccagtggagcccttc      |
| Fgf5RV           | gagacacagcaaatatttccaaaa |
| T (Brachyury) FW | cagcccacctactggctcta     |
| T (Brachyury) RV | gagcctggggtgatggta       |

### Superose 6 gel filtration of ES cell nuclear extracts

200 µl ES cell nuclear extract was separated on a 25 ml Superose 6 gel filtration column (GE Healthcare) with a flow rate of 0.1 ml per minute in C-100 buffer (20 mM Hepes pH 7.6, 0.2 mM EDTA, 1.5 mM MgCl<sub>2</sub>, 100 mM KCl, 20% glycerol). 0.5 ml elution fractions were TCA precipitated, separated on SDS polyacrylamide and western blots probed with anti-Oct3/4 antibody (sc-8628, Santa Cruz) or anti-Mta2 (8106, Abcam). The Superose 6 column was calibrated with gel filtration calibration standards (GE Healthcare).

### Mass spectrometric analysis

1D SDS-PAGE gel lanes were cut into 2-mm slices using an automatic gel slicer and subjected to in-gel reduction with dithiothreitol, alkylation with iodoacetamide and digestion with trypsin (Promega, sequencing grade), essentially as described by (Wilm et al., 1996). Nanoflow LC-MS/MS was performed on an 1100 series capillary LC system (Agilent Technologies) coupled to an LTQ-Orbitrap mass spectrometer (Thermo) operating in positive mode and equipped with a nanospray source. Peptide mixtures were trapped on a ReproSil C18 reversed phase column (Dr Maisch GmbH; column dimensions 1.5 cm × 100 µm, packed in-house) at a flow rate of 8 µl/min. Peptide separation was performed on ReproSil C18 reversed phase column (Dr Maisch GmbH; column dimensions 15 cm × 50 µm, packed in-house) using a linear gradient from 0 to

80% B (A = 0.1 % formic acid; B = 80% (v/v) acetonitrile, 0.1 % formic acid) in 70 min and at a constant flow rate of 200 nl/min using a splitter. The column eluent was directly sprayed into the ESI source of the mass spectrometer. Mass spectra were acquired in continuum mode; fragmentation of the peptides was performed in data-dependent mode. Peak lists were automatically created from raw data files using the Mascot Distiller software (version 2.1; MatrixScience). The Mascot search algorithm (version 2.2, MatrixScience) was used for searching against the NCBI database (release NCBIInr\_20090222; taxonomy: *Mus musculus*) or the IPI\_mouse\_database (release 20090924). The peptide tolerance was typically set to 10 ppm and the fragment ion tolerance to 0.8 Da. A maximum number of 2 missed cleavages by trypsin were allowed and carbamidomethylated cysteine and oxidized methionine were set as fixed and variable modifications, respectively. The Mascot score cut-off value for a positive protein hit was set to 60, based on at least two peptides. In case of protein identifications with Mascot scores between 50 and 60, or that were based on only one peptide, individual peptide MS/MS spectra were checked manually and either interpreted as valid identifications or discarded. We also show a more quantitative measure of our identified proteins, emPAI score (Ishihama et al., 2005). emPAI score incorporates the number of peptides identified per protein (spectral counts) normalized by the theoretical number of peptides. This is a superior method over just counting the number of identified peptides, because it takes account of the fact that, for the same number of molecules, larger proteins and proteins with many peptides in the preferred mass range for mass spectrometry will generate more observed peptides.

Wilm, M., Shevchenko, A., Houthaeve, T., Breit, S., Schweigerer, L., Fotsis, T., and Mann, M. (1996). Femtomole sequencing of proteins from polyacrylamide gels by nano-electrospray mass spectrometry. *Nature* 379, 466-469.

Ishihama, Y., Oda, Y., Tabata, T., Sato, T., Nagasu, T., Rappsilber, J., and Mann, M. (2005). Exponentially modified protein abundance index (emPAI) for estimation of absolute protein amount in proteomics by the number of sequenced peptides per protein. *Mol Cell Proteomics* 4, 1265-1272.

### Immunoprecipitation with tagged proteins

Coding sequences were amplified from mouse ES cell cDNA and inserted with an C-terminal V5-tag (Tcfcp2l1 and Zfp143) or FLAG-tag (Nac1) into a pPyCAG-driven expression vector. 46C ES cells (Ying et al., 2003) were transfected with the constructs using Lipofectamine 2000 (Invitrogen), nuclear extracts were made 24 hrs after transfection and immunoprecipitations were done, as described in the Experimental Procedures.

### Primers used for amplification ChIP targets

| Gene                           | FW primer                      | RV primer                  |
|--------------------------------|--------------------------------|----------------------------|
| <i>Fbxo15</i> (-0.6kb)         | TCCCCCTGTAAATTTCACTCA          | TAGCTAGCTGGTTGGTCCAC       |
| <i>Rest</i> (-3.1kb)           | CTCCCCCTGGACAATAGCTTC          | CGTCCTTCATTTCCCTCAGTG      |
| <i>Nanog</i> enhancer (-5kb)   | GTCCCCGCTCCTTTTCAGCACTAACCATAC | CGGTTTGAATAGGGAGGAGGGCGTCT |
| <i>Nanog</i> promoter (-0.2kb) | AAGATGAATAAAGTGAAATGAGGTAAAGC  | ACTGGGAGGGAGGGAAAGC        |
| <i>Dppa3</i> (-1.7kb)          | GATCCAGCTGGTCTGAGCTA           | GTGCAGGGATCATAGGAGTG       |
| <i>Zfp42</i> enhancer (-14kb)  | GTGTGGTGTGTGAGCAGGTGT          | TGACACAAAGCTTCACTACGG      |
| <i>Mybl2</i> (-2.4kb)          | GACCACTCCAGGTTTACT             | AGGAATCTGGTGACCTCCAC       |
| <i>Pcsk6</i> (+11.5kb)         | ACTTGGGATCCTCCCTTCTT           | ATCCTAGGCAGTGCTGGTCT       |
| <i>Mcl1</i> (+4.7kb)           | CTCCCCCTTGAAGTTAACCA           | GATGGCTGACTGGAGTCTCA       |
| <i>Pramel6</i> (+8.5kb)        | CTCAGGGAACGCCAGTTTAT           | ATGGGATCCCCACATAGAAA       |
| <i>Loxl1</i> (+33.6kb)         | TGCATTGTCAAGAAACAAAGG          | TTTCTGGATAGCCCATCTCC       |
| <i>B3gnt7</i> (+7.6kb)         | ATCCCACTGTTACCCAGAGC           | CCCTACTCCCCGGTACTACA       |
| <i>Slc27a4</i> (+17.9kb)       | TAGTCTTTGGCGGCAGTTTA           | CTTCTCTCTCCATTCTTGT        |
| <i>Sirpa</i> (-5.0kb)          | CTGGACTCATTGTGGATTGG           | TCTGGGGATCTGGTTCTACC       |

## References for Oct4 interaction network

References for (genome-wide) chromatin immunoprecipitation data; Oct4 (Chen et al., 2008b; Endoh et al., 2008; Kim et al., 2008), Sox2 (Chen et al., 2008b; Kim et al., 2008), Esrrb (Chen et al., 2008b; van den Berg et al., 2008), Klf5 (Jiang et al., 2008; Kim et al., 2008; Parisi et al., 2008), Dax1, Nac1 (Kim et al., 2008), Tcfcp2l1 (Chen et al., 2008b), PRC1 complex (Boyer et al., 2006; Endoh et al., 2008; Ku et al., 2008). References for ES cell and developmental phenotypes (Table 2); NuRD subunits (Hendrich et al., 2001; Kaji et al., 2006; Lagger et al., 2002; Liang et al., 2008; Marino and Nusse, 2007; Zimmermann et al., 2007), SWI/SNF subunits (Bultman et al., 2000; Fazio et al., 2008; Kim et al., 2001; Klochendler-Yeivin et al., 2000), PRC1 subunits (Endoh et al., 2008; Hu et al., 2009; Pirity et al., 2005; Takihara et al., 1997; van der Stoop et al., 2008; Voncken et al., 2003), Trrap subunits (Fazio et al., 2008; Herceg et al., 2001; Ueda et al., 2007), Lsd1 complex (Hildebrand and Soriano, 2002; Wang et al., 2009; Wang et al., 2007), Sall4 (Elling et al., 2006; Yuri et al., 2009; Zhang et al., 2006), Sall1 (Nishinakamura et al., 2001), Zfp219 (Hu et al., 2009), Wdr5 (Ding et al., 2009), Ubp1 (Parekh et al., 2004), Mga (Hu et al., 2009), Arid3b (Takebe et al., 2006), Sox2 (Avilion et al., 2003; Masui et al., 2007), Nac1 (Mackler et al., 2008; Wang et al., 2006), Tcfcp2l1 (Ivanova et al., 2006), Rbpj (Oka et al., 1995), Esrrb (Ivanova et al., 2006; Loh et al., 2006; Luo et al., 1997), hcf1 (Dejosez et al., 2008), Dax1 (Niakan et al., 2006), Zfp143 (Chen et al., 2008a), Pml (Wang et al., 1998), Foxp4 (Li et al., 2004), Ctbp2 (Hildebrand and Soriano, 2002; Tarleton and Lemischka, 2010), Klf5 (Parisi et al., 2008; Shindo et al., 2002), Rif1 (Loh et al., 2006), Smc1a (Hu et al., 2009), Msh2 (de Wind et al., 1995), Ogt (O'Donnell et al., 2004; Shafi et al., 2000).

## REFERENCES

- Avilion, A.A., Nicolis, S.K., Pevny, L.H., Perez, L., Vivian, N., and Lovell-Badge, R. (2003). Multipotent cell lineages in early mouse development depend on SOX2 function. *Genes Dev* 17, 126-140.
- Boyer, L.A., Plath, K., Zeitlinger, J., Brambrink, T., Medeiros, L.A., Lee, T.I., Levine, S.S., Wernig, M., Tajonar, A., Ray, M.K., *et al.* (2006). Polycomb complexes repress developmental regulators in murine embryonic stem cells. *Nature* 441, 349-353.
- Bultman, S., Gebuhr, T., Yee, D., La Mantia, C., Nicholson, J., Gilliam, A., Randazzo, F., Metzger, D., Chambon, P., Crabtree, G., *et al.* (2000). A Brg1 null mutation in the mouse reveals functional differences among mammalian SWI/SNF complexes. *Mol Cell* 6, 1287-1295.
- Chen, X., Fang, F., Liou, Y.C., and Ng, H.H. (2008a). Zfp143 regulates Nanog through modulation of Oct4 binding. *Stem Cells* 26, 2759-2767.
- Chen, X., Xu, H., Yuan, P., Fang, F., Huss, M., Vega, V.B., Wong, E., Orlov, Y.L., Zhang, W., Jiang, J., *et al.* (2008b). Integration of external signaling pathways with the core transcriptional network in embryonic stem cells. *Cell* 133, 1106-1117.
- de Wind, N., Dekker, M., Berns, A., Radman, M., and te Riele, H. (1995). Inactivation of the mouse Msh2 gene results in mismatch repair deficiency, methylation tolerance, hyperrecombination, and predisposition to cancer. *Cell* 82, 321-330.
- Dejosez, M., Krumenacker, J.S., Zitur, L.J., Passeri, M., Chu, L.F., Songyang, Z., Thomson, J.A., and Zwaka, T.P. (2008). Ronin is essential for embryogenesis and the pluripotency of mouse embryonic stem cells. *Cell* 133, 1162-1174.
- Ding, L., Paszkowski-Rogacz, M., Nitzsche, A., Slabicki, M.M., Heninger, A.K., de Vries, I., Kittler, R., Junqueira, M., Shevchenko, A., Schulz, H., *et al.* (2009). A genome-scale RNAi screen for Oct4 modulators defines a role of the Paf1 complex for embryonic stem cell identity. *Cell stem cell* 4, 403-415.
- Elling, U., Klasen, C., Eisenberger, T., Anlag, K., and Treier, M. (2006). Murine inner cell mass-derived lineages depend on Sall4 function. *Proc Natl Acad Sci U S A* 103, 16319-16324.

Endoh, M., Endo, T.A., Endoh, T., Fujimura, Y., Ohara, O., Toyoda, T., Otte, A.P., Okano, M., Brockdorff, N., Vidal, M., *et al.* (2008). Polycomb group proteins Ring1A/B are functionally linked to the core transcriptional regulatory circuitry to maintain ES cell identity. *Development* *135*, 1513-1524.

Fazio, T.G., Huff, J.T., and Panning, B. (2008). An RNAi screen of chromatin proteins identifies Tip60-p400 as a regulator of embryonic stem cell identity. *Cell* *134*, 162-174.

Hendrich, B., Guy, J., Ramsahoye, B., Wilson, V.A., and Bird, A. (2001). Closely related proteins MBD2 and MBD3 play distinctive but interacting roles in mouse development. *Genes Dev* *15*, 710-723.

Herceg, Z., Hulla, W., Gell, D., Cuenin, C., Leonart, M., Jackson, S., and Wang, Z.Q. (2001). Disruption of *Trrap* causes early embryonic lethality and defects in cell cycle progression. *Nat Genet* *29*, 206-211.

Hildebrand, J.D., and Soriano, P. (2002). Overlapping and unique roles for C-terminal binding protein 1 (CtBP1) and CtBP2 during mouse development. *Mol Cell Biol* *22*, 5296-5307.

Hu, G., Kim, J., Xu, Q., Leng, Y., Orkin, S.H., and Elledge, S.J. (2009). A genome-wide RNAi screen identifies a new transcriptional module required for self-renewal. *Genes Dev* *23*, 837-848.

Ishihama, Y., Oda, Y., Tabata, T., Sato, T., Nagasu, T., Rappsilber, J., and Mann, M. (2005). Exponentially modified protein abundance index (emPAI) for estimation of absolute protein amount in proteomics by the number of sequenced peptides per protein. *Mol Cell Proteomics* *4*, 1265-1272.

Ivanova, N., Dobrin, R., Lu, R., Kotenko, I., Levorse, J., DeCoste, C., Schafer, X., Lun, Y., and Lemischka, I.R. (2006). Dissecting self-renewal in stem cells with RNA interference. *Nature* *442*, 533-538.

Jiang, J., Chan, Y.S., Loh, Y.H., Cai, J., Tong, G.Q., Lim, C.A., Robson, P., Zhong, S., and Ng, H.H. (2008). A core Klf circuitry regulates self-renewal of embryonic stem cells. *Nat Cell Biol* *10*, 353-360.

Kaji, K., Caballero, I.M., MacLeod, R., Nichols, J., Wilson, V.A., and Hendrich, B. (2006). The NuRD component Mbd3 is required for pluripotency of embryonic stem cells. *Nat Cell Biol* *8*, 285-292.

Kim, J., Chu, J., Shen, X., Wang, J., and Orkin, S.H. (2008). An extended transcriptional network for pluripotency of embryonic stem cells. *Cell* *132*, 1049-1061.

Kim, J.K., Huh, S.O., Choi, H., Lee, K.S., Shin, D., Lee, C., Nam, J.S., Kim, H., Chung, H., Lee, H.W., *et al.* (2001). *Srg3*, a mouse homolog of yeast SWI3, is essential for early embryogenesis and involved in brain development. *Mol Cell Biol* *21*, 7787-7795.

Klochender-Yeivin, A., Fiette, L., Barra, J., Muchardt, C., Babinet, C., and Yaniv, M. (2000). The murine SNF5/INI1 chromatin remodeling factor is essential for embryonic development and tumor suppression. *EMBO Rep* *1*, 500-506.

Ku, M., Koche, R.P., Rheinbay, E., Mendenhall, E.M., Endoh, M., Mikkelsen, T.S., Presser, A., Nusbaum, C., Xie, X., Chi, A.S., *et al.* (2008). Genomewide analysis of PRC1 and PRC2 occupancy identifies two classes of bivalent domains. *PLoS genetics* *4*, e1000242.

Lager, G., O'Carroll, D., Rembold, M., Khier, H., Tischler, J., Weitzer, G., Schuettengruber, B., Hauser, C., Brunmeir, R., Jenuwein, T., *et al.* (2002). Essential function of histone deacetylase 1 in proliferation control and CDK inhibitor repression. *Embo J* *21*, 2672-2681.

Li, S., Zhou, D., Lu, M.M., and Morrissey, E.E. (2004). Advanced cardiac morphogenesis does not require heart tube fusion. *Science* *305*, 1619-1622.

Liang, J., Wan, M., Zhang, Y., Gu, P., Xin, H., Jung, S.Y., Qin, J., Wong, J., Cooney, A.J., Liu, D., *et al.* (2008). Nanog and Oct4 associate with unique transcriptional repression complexes in embryonic stem cells. *Nat Cell Biol* *10*, 731-739.

Loh, Y.H., Wu, Q., Chew, J.L., Vega, V.B., Zhang, W., Chen, X., Bourque, G., George, J., Leong, B., Liu, J., *et al.* (2006). The Oct4 and Nanog transcription network regulates pluripotency in mouse embryonic stem cells. *Nat Genet* *38*, 431-440.

Luo, J., Sladek, R., Bader, J.A., Matthysen, A., Rossant, J., and Giguere, V. (1997). Placental abnormalities in mouse embryos lacking the orphan nuclear receptor ERR-beta. *Nature* *388*, 778-782.

Mackler, S., Pacchioni, A., Degnan, R., Homan, Y., Conti, A.C., Kalivas, P., and Blendy, J.A. (2008). Requirement for the POZ/BTB protein NAC1 in acute but not chronic psychomotor stimulant response. *Behavioural brain research* 187, 48-55.

Marino, S., and Nusse, R. (2007). Mutants in the mouse NuRD/Mi2 component P66alpha are embryonic lethal. *PLoS ONE* 2, e519.

Masui, S., Nakatake, Y., Toyooka, Y., Shimosato, D., Yagi, R., Takahashi, K., Okochi, H., Okuda, A., Matoba, R., Sharov, A.A., *et al.* (2007). Pluripotency governed by Sox2 via regulation of Oct3/4 expression in mouse embryonic stem cells. *Nat Cell Biol* 9, 625-635.

Niakan, K.K., Davis, E.C., Clipsham, R.C., Jiang, M., Dehart, D.B., Sulik, K.K., and McCabe, E.R. (2006). Novel role for the orphan nuclear receptor Dax1 in embryogenesis, different from steroidogenesis. *Molecular genetics and metabolism* 88, 261-271.

Nishinakamura, R., Matsumoto, Y., Nakao, K., Nakamura, K., Sato, A., Copeland, N.G., Gilbert, D.J., Jenkins, N.A., Scully, S., Lacey, D.L., *et al.* (2001). Murine homolog of SALL1 is essential for ureteric bud invasion in kidney development. *Development* 128, 3105-3115.

O'Donnell, N., Zachara, N.E., Hart, G.W., and Marth, J.D. (2004). Ogt-dependent X-chromosome-linked protein glycosylation is a requisite modification in somatic cell function and embryo viability. *Mol Cell Biol* 24, 1680-1690.

Oka, C., Nakano, T., Wakeham, A., de la Pompa, J.L., Mori, C., Sakai, T., Okazaki, S., Kawaichi, M., Shiota, K., Mak, T.W., *et al.* (1995). Disruption of the mouse RBP-J kappa gene results in early embryonic death. *Development* 121, 3291-3301.

Parekh, V., McEwen, A., Barbour, V., Takahashi, Y., Rehg, J.E., Jane, S.M., and Cunningham, J.M. (2004). Defective extraembryonic angiogenesis in mice lacking LBP-1a, a member of the grainyhead family of transcription factors. *Mol Cell Biol* 24, 7113-7129.

Parisi, S., Passaro, F., Aloia, L., Manabe, I., Nagai, R., Pastore, L., and Russo, T. (2008). Klf5 is involved in self-renewal of mouse embryonic stem cells. *J Cell Sci* 121, 2629-2634.

Pirity, M.K., Locker, J., and Schreiber-Agus, N. (2005). Rybp/DEDAF is required for early postimplantation and for central nervous system development. *Mol Cell Biol* 25, 7193-7202.

Shafi, R., Iyer, S.P., Ellies, L.G., O'Donnell, N., Marek, K.W., Chui, D., Hart, G.W., and Marth, J.D. (2000). The O-GlcNAc transferase gene resides on the X chromosome and is essential for embryonic stem cell viability and mouse ontogeny. *Proc Natl Acad Sci U S A* 97, 5735-5739.

Shindo, T., Manabe, I., Fukushima, Y., Tobe, K., Aizawa, K., Miyamoto, S., Kawai-Kowase, K., Moriyama, N., Imai, Y., Kawakami, H., *et al.* (2002). Kruppel-like zinc-finger transcription factor KLF5/BTEB2 is a target for angiotensin II signaling and an essential regulator of cardiovascular remodeling. *Nat Med* 8, 856-863.

Takebe, A., Era, T., Okada, M., Martin Jakt, L., Kuroda, Y., and Nishikawa, S. (2006). Microarray analysis of PDGFR alpha+ populations in ES cell differentiation culture identifies genes involved in differentiation of mesoderm and mesenchyme including ARID3b that is essential for development of embryonic mesenchymal cells. *Dev Biol* 293, 25-37.

Takahara, Y., Tomotsune, D., Shirai, M., Katoh-Fukui, Y., Nishii, K., Motaleb, M.A., Nomura, M., Tsuchiya, R., Fujita, Y., Shibata, Y., *et al.* (1997). Targeted disruption of the mouse homologue of the Drosophila polyhomeotic gene leads to altered anteroposterior patterning and neural crest defects. *Development* 124, 3673-3682.

Tarleton, H.P., and Lemischka, I.R. (2010). Delayed differentiation in embryonic stem cells and mesodermal progenitors in the absence of CtBP2. *Mech Dev* 127, 107-119.

Ueda, T., Watanabe-Fukunaga, R., Ogawa, H., Fukuyama, H., Higashi, Y., Nagata, S., and Fukunaga, R. (2007). Critical role of the p400/mDomino chromatin-remodeling ATPase in embryonic hematopoiesis. *Genes Cells* 12, 581-592.

van den Berg, D.L., Zhang, W., Yates, A., Engelen, E., Takacs, K., Bezstarosti, K., Demmers, J., Chambers, I., and Poot, R.A. (2008). Estrogen-related receptor beta interacts with Oct4 to positively regulate Nanog gene expression. *Mol Cell Biol* 28, 5986-5995.

van der Stoep, P., Boutsma, E.A., Hulsman, D., Noback, S., Heimerikx, M., Kerkhoven, R.M., Voncken, J.W., Wessels, L.F., and van Lohuizen, M. (2008). Ubiquitin E3 ligase Ring1b/Rnf2 of polycomb repressive complex 1 contributes to stable maintenance of mouse embryonic stem cells. *PLoS ONE* 3, e2235.

Voncken, J.W., Roelen, B.A., Roefs, M., de Vries, S., Verhoeven, E., Marino, S., Deschamps, J., and van Lohuizen, M. (2003). Rnf2 (Ring1b) deficiency causes gastrulation arrest and cell cycle inhibition. *Proc Natl Acad Sci U S A* *100*, 2468-2473.

Wang, J., Hevi, S., Kurash, J.K., Lei, H., Gay, F., Bajko, J., Su, H., Sun, W., Chang, H., Xu, G., *et al.* (2009). The lysine demethylase LSD1 (KDM1) is required for maintenance of global DNA methylation. *Nat Genet* *41*, 125-129.

Wang, J., Rao, S., Chu, J., Shen, X., Levasseur, D.N., Theunissen, T.W., and Orkin, S.H. (2006). A protein interaction network for pluripotency of embryonic stem cells. *Nature* *444*, 364-368.

Wang, J., Scully, K., Zhu, X., Cai, L., Zhang, J., Prefontaine, G.G., Krones, A., Ohgi, K.A., Zhu, P., Garcia-Bassets, I., *et al.* (2007). Opposing LSD1 complexes function in developmental gene activation and repression programmes. *Nature* *446*, 882-887.

Wang, Z.G., Delva, L., Gaboli, M., Rivi, R., Giorgio, M., Cordon-Cardo, C., Grosveld, F., and Pandolfi, P.P. (1998). Role of PML in cell growth and the retinoic acid pathway. *Science* *279*, 1547-1551.

Wilm, M., Shevchenko, A., Houthaeve, T., Breit, S., Schweigerer, L., Fotsis, T., and Mann, M. (1996). Femtomole sequencing of proteins from polyacrylamide gels by nano-electrospray mass spectrometry. *Nature* *379*, 466-469.

Ying, Q.L., Stavridis, M., Griffiths, D., Li, M., and Smith, A. (2003). Conversion of embryonic stem cells into neuroectodermal precursors in adherent monoculture. *Nat Biotechnol* *21*, 183-186.

Yuri, S., Fujimura, S., Nimura, K., Takeda, N., Toyooka, Y., Fujimura, Y., Aburatani, H., Ura, K., Koseki, H., Niwa, H., *et al.* (2009). Sall4 is essential for stabilization, but not for pluripotency, of embryonic stem cells by repressing aberrant trophectoderm gene expression. *Stem Cells* *27*, 796-805.

Zhang, J., Tam, W.L., Tong, G.Q., Wu, Q., Chan, H.Y., Soh, B.S., Lou, Y., Yang, J., Ma, Y., Chai, L., *et al.* (2006). Sall4 modulates embryonic stem cell pluripotency and early embryonic development by the transcriptional regulation of Pou5f1. *Nat Cell Biol* *8*, 1114-1123.

Zimmermann, S., Kiefer, F., Prudenziati, M., Spiller, C., Hansen, J., Floss, T., Wurst, W., Minucci, S., and Gottlicher, M. (2007). Reduced body size and decreased intestinal tumor rates in HDAC2-mutant mice. *Cancer Res* *67*, 9047-9054.

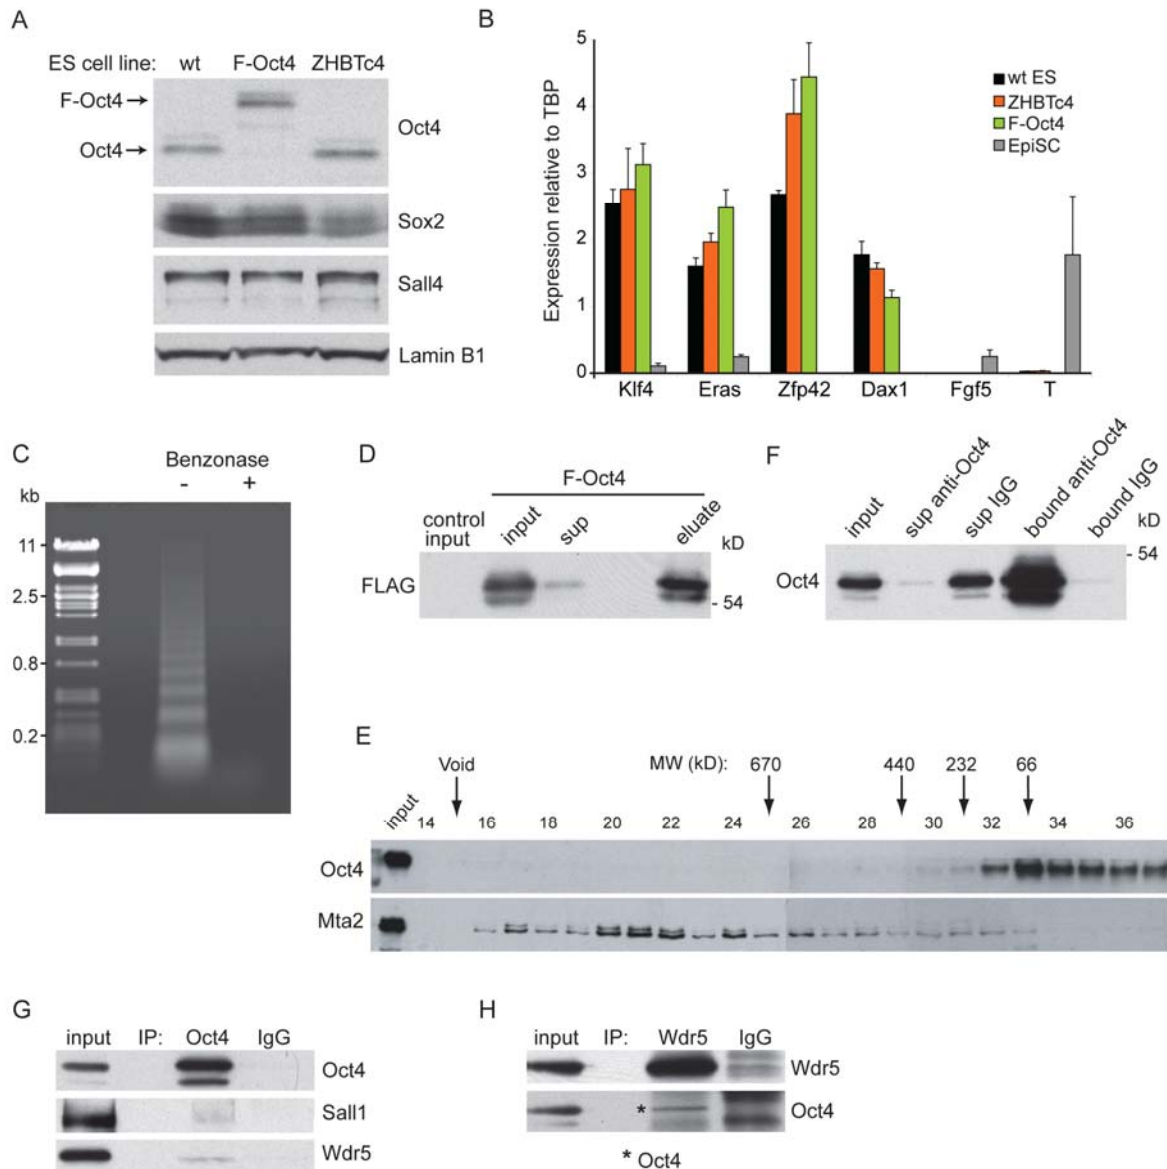

**Figure S1. Additional data on Oct4 purifications**

(A) Expression levels of ES cell markers in F-Oct4 and ZHBTc4 ES cells. Extracts from wild type (wt), F-Oct4 and ZHBTc4 ES cells were probed by western with the indicated antibodies. Lamin B1 served as a loading control.

(B) Quantitative RT-PCR analysis of indicated transcript levels in wild type (wt), ZHBTc4, F-Oct4 ES cells and epiblast stem cells.

(C) Treatment of ES cell nuclear extract with Benzonase removes DNA. DNA purified from 100  $\mu$ l nuclear extract treated with 15 units Benzonase for 3 hrs at 4°C (+ Benzonase), or not treated (- Benzonase). Size markers are indicated.

(D) F-Oct4 is depleted from nuclear extract by anti-FLAG purification, as shown by anti-FLAG western. Input, supernatant after purification (sup), eluate and control input from ZHBTc4 ES cells (not expressing F-Oct4) are indicated.

(E) Gel filtration analysis of Oct4 and NuRD subunit Mta2. Mouse ES cell nuclear extract was size-fractionated on a Superose-6 gel filtration column. Fractions were resolved on an SDS-polyacrylamide gel and probed with the indicated antibodies. Molecular weights of gel filtration standards are indicated.

(F) Oct4 is depleted from nuclear extract by anti-Oct4 immunoprecipitation. Input, supernatant (sup) and bound fraction are indicated.

(G) Verification of Oct4 interactions. Oct4 immunoprecipitates analyzed by western blots with the indicated antibodies.

(H) Wdr5 immunoprecipitates analyzed by western blots with the indicated antibodies, \* indicates Oct4 band.

Figure S1, related to Figure 1



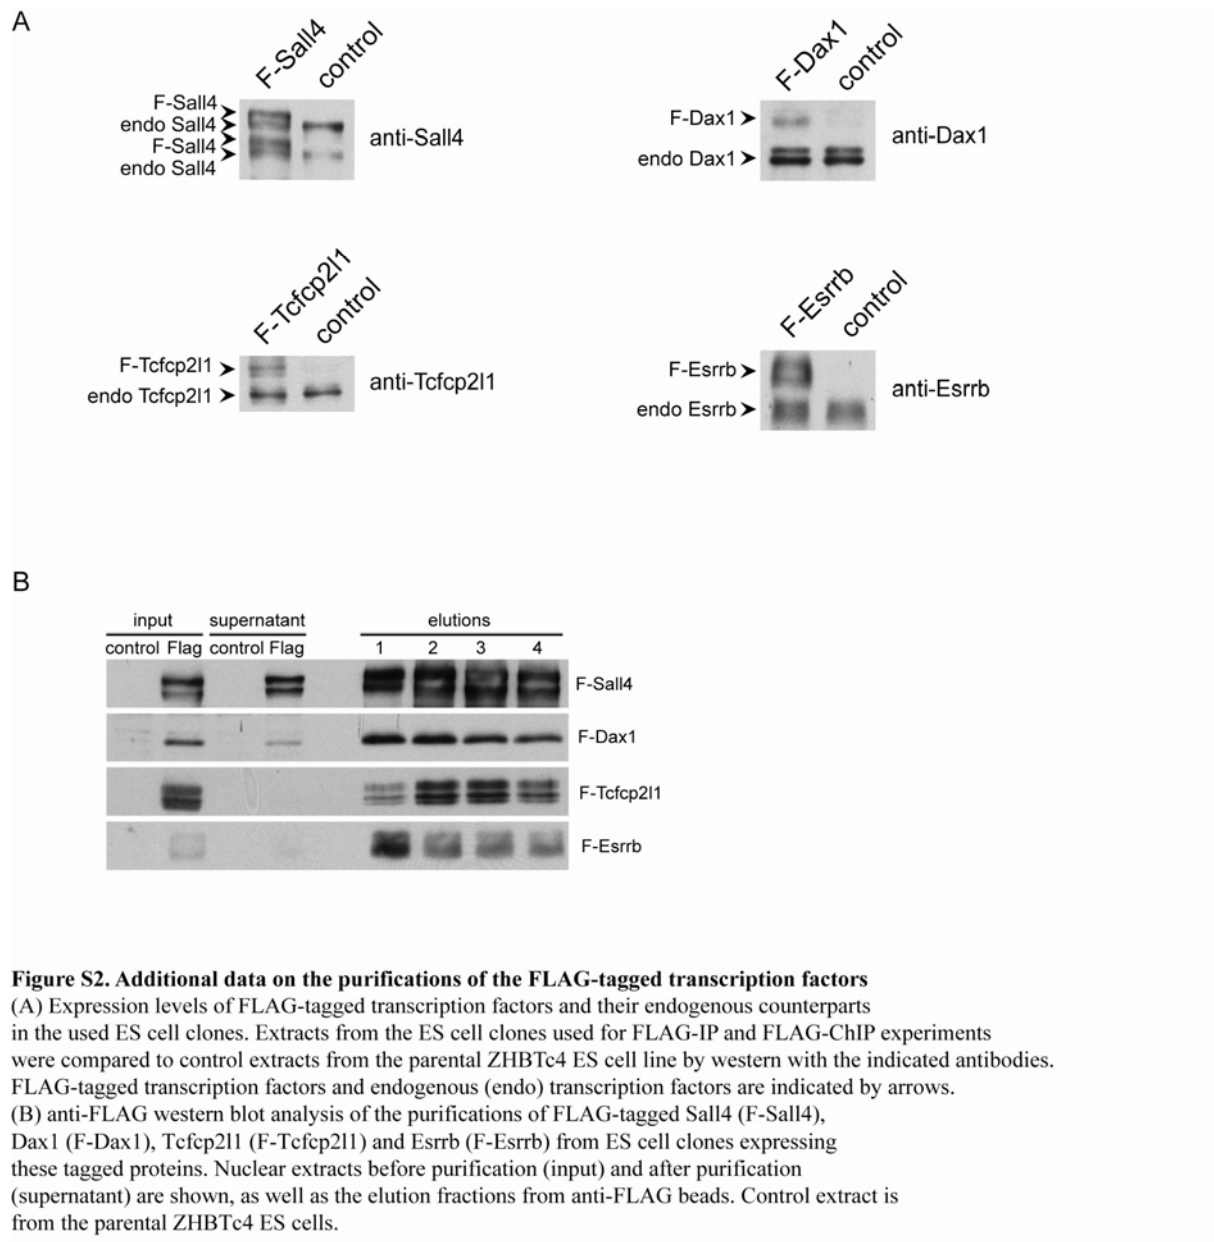

Figure S2, related to Figure 2

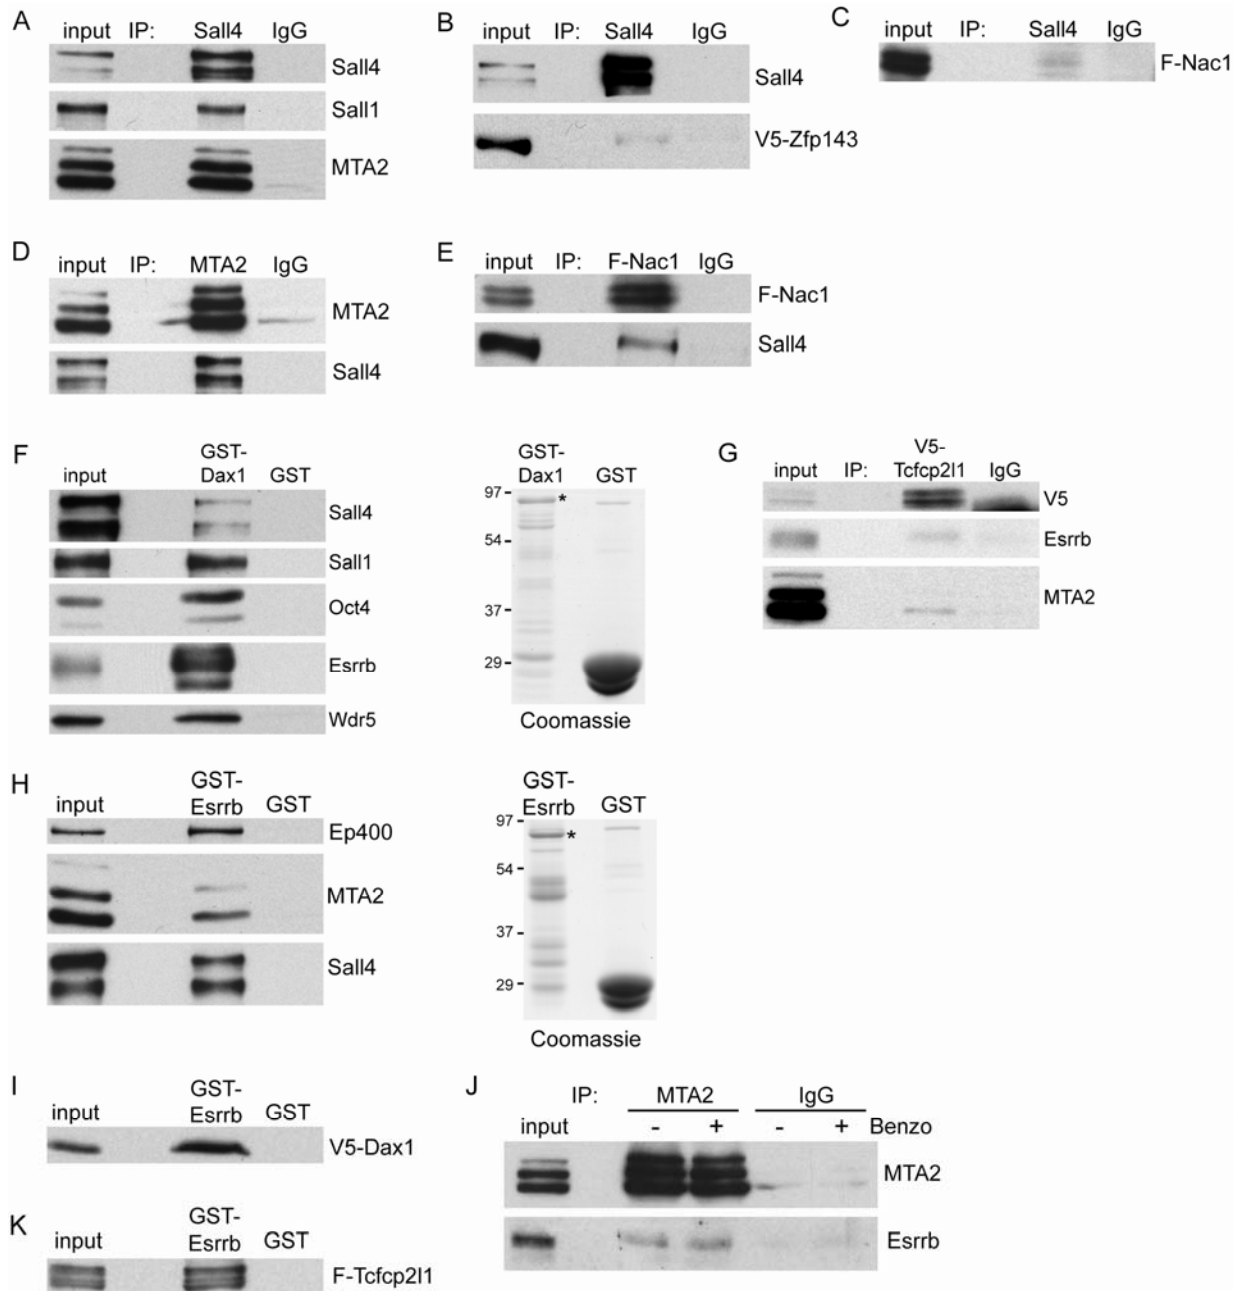

**Figure S3. Verification of interactions of Sall4, Dax1, Tcfcp211 and Esrrb by GST-pull down and immunoprecipitation**

- (A) Sall4 immunoprecipitates analyzed by western blots with the indicated antibodies.  
 (B) Sall4 immunoprecipitates from extracts of V5-Zfp143 transfected ES cells analyzed by western blots with Sall4 and V5 antibodies.  
 (C) Sall4 immunoprecipitates from extracts of F-Nac1 transfected ES cells analyzed by western blot with Flag antibody.  
 (D) MTA2 immunoprecipitates analyzed by western blots with the indicated antibodies.  
 (E) F-Nac1 immunoprecipitates from extracts of F-Nac1 transfected ES cells analyzed by western blots with Flag and Sall4 antibodies.  
 (F, left panel) GST-Dax1 precipitates analyzed by western blots with the indicated antibodies.  
 (F, right panel) GST-Dax1 (\*) and GST bound to beads, as used in the GST pull down, analyzed by Coomassie stained PAA gel.  
 (G) V5-Tcfcp211 immunoprecipitates analyzed by western blots with the indicated antibodies.  
 (H, left panel) GST-Esrrb precipitates analyzed by western blots with the indicated antibodies.  
 (H, right panel) GST-Esrrb (\*) and GST bound to beads, as used in the GST pull down, analyzed by Coomassie stained PAA gel.  
 (I) GST-Esrrb precipitates analyzed by western blots with V5 antibody.  
 (J) GST-Esrrb precipitates analyzed by western blots with Flag antibody.  
 (K) MTA2 immunoprecipitates analyzed by western blots with the indicated antibodies. Benzonase was added where indicated.

Figure S3, related to Figure 3

**Table S1. Oct4-interacting proteins: emPAI scores**

| Protein                      | Accession    | Flag#1<br>emPAI <sup>a</sup> | Flag#2<br>emPAI <sup>a</sup> | Flag#3<br>emPAI <sup>a</sup> | Oct4-IP<br>emPAI <sup>a</sup> | average<br>emPAI <sup>a</sup> |
|------------------------------|--------------|------------------------------|------------------------------|------------------------------|-------------------------------|-------------------------------|
| <b>Oct4 (Pou5f1)</b>         | gi 200118    | 1.36                         | 7.03(0.22)                   | 12.38(0.32)                  | 2.63                          | 5.85                          |
| <b>NuRD complex</b>          |              |                              |                              |                              |                               |                               |
| Mi2beta (Chd4)               | gi 39204553  | 0.68(0.02)                   | 1.38                         | 1.57(0.12)                   | 1.22(0.06)                    | 1.21                          |
| Mta1                         | gi 15077051  | 0.72                         | 1.97                         | 2.27                         | 0.98                          | 1.49                          |
| Gatad2a                      | gi 148696823 | 0.9                          | 1.48                         | 3.47(0.45)                   | 0.71                          | 1.64                          |
| Mta2                         | gi 51491880  | 0.69                         | 1.48                         | 2.33                         | 0.86(0.05)                    | 1.34                          |
| Gatad2b                      | gi 120577529 | 0.73                         | 1.16                         | 4.16(0.18)                   | 0.55                          | 1.65                          |
| Hdac1                        | gi 2347180   | 2.66(0.14)                   | 2.43(0.07)                   | 2.36(0.21)                   | 1.82(0.21)                    | 2.32                          |
| Mbd3                         | gi 7305261   | 1.39                         | 1.41                         | 8.24                         | 6.26(0.12)                    | 4.33                          |
| Mta3                         | gi 18381007  | 0.44                         | 0.45                         | 1.96                         | 1.21(0.05)                    | 1.02                          |
| Hdac2                        | gi 3023934   | 2.2(0.21)                    | 1.47(0.07)                   | 2.55                         | 1.32(0.21)                    | 1.89                          |
| Rbbp7                        | gi 2494892   | 0.82(0.18)                   | 1.09                         | 1.66(0.82)                   | 1.09                          | 1.17                          |
| <b>SWI/SNF complex</b>       |              |                              |                              |                              |                               |                               |
| Baf155(Smarcc1)              | gi 30851572  | 0.34                         | 0.39                         | 0.78                         | 0.16(0.16)                    | 0.42                          |
| Brg1 (Smarca4)               | gi 76253779  | 0.08                         | 0.22                         | 0.18                         | 0.17(0.11)                    | 0.16                          |
| <b>PRC1 complex</b>          |              |                              |                              |                              |                               |                               |
| Phc1                         | gi 30923312  | 0.13                         | 0.19                         | 0.51                         | -                             | 0.21                          |
| Ring1B (Rnf2)                | gi 109157342 | 1.51                         | 0.21                         | 1.02(0.1)                    | 0.45(0.1)                     | 0.80                          |
| Rybp                         | gi 5381327   | 0.15(0.15)                   | 0.15                         | 0.3                          | 0.15                          | 0.19                          |
| <b>Trrap/p400 complex</b>    |              |                              |                              |                              |                               |                               |
| Trrap                        | gi 124486949 | 0.01                         | 0.04                         | 0.02                         | 0.05                          | 0.03                          |
| Ep400                        | gi 27348237  | 0.03                         | 0.01                         | 0.05                         | 0.02                          | 0.03                          |
| <b>LSD1 complex</b>          |              |                              |                              |                              |                               |                               |
| Lsd1                         | gi 51315882  | 0.12                         | 0.35                         | 0.54                         | 0.08                          | 0.27                          |
| Zmym2                        | gi 28175571  | 0.03                         | 0.2                          | 0.11                         | -                             | 0.09                          |
| Rcor2                        | gi 17298682  | 0.07                         | 0.14                         | 0.34                         | 0.21                          | 0.19                          |
| <b>Transcription factors</b> |              |                              |                              |                              |                               |                               |
| Sall4                        | gi 81913723  | 2.78(0.29)                   | 3.03(0.09)                   | 6.23(0.42)                   | 2.44(0.43)                    | 3.62                          |
| Sall1                        | gi 14164331  | 1.05                         | 1.58                         | 1.8                          | 1                             | 1.36                          |
| Zfp219                       | gi 30794418  | 0.18                         | 0.44                         | 0.29                         | 0.32                          | 0.31                          |
| Arid3b                       | gi 9790033   | 0.19                         | 0.27                         | 1.7                          | 0.13                          | 0.57                          |
| Wdr5                         | gi 16554627  | 0.62(0.17)                   | 0.21                         | 1.05(0.1)                    | 0.62                          | 0.63                          |
| Zfp462                       | gi 114431238 | -                            | 0.04                         | 0.07                         | 0.23                          | 0.09                          |
| Mga                          | gi 6692607   | -                            | 0.07                         | 0.1                          | 0.04                          | 0.05                          |
| Sox2                         | gi 127140986 | 0.23                         | -                            | 3.29                         | 1.07                          | 1.15                          |
| Ubp1                         | gi 7305605   | 0.38                         | 0.14                         | 0.32                         | 0.29                          | 0.28                          |
| Nac1                         | gi 31543309  | -                            | 0.37                         | 0.34                         | 0.37                          | 0.27                          |
| Hcfc1                        | gi 4098678   | 0.02                         | 0.09                         | 0.14(0.02)                   | -                             | 0.06                          |
| Hells                        | gi 12232371  | -                            | 0.26                         | 0.19                         | 0.04                          | 0.12                          |
| Rbpj                         | gi 94400775  | 1.04                         | 0.23                         | 0.12                         | 0.32                          | 0.43                          |
| Tcfcp2l1                     | gi 90101766  | 0.3                          | 0.14                         | 0.06                         | 0.14                          | 0.16                          |
| Requiem                      | gi 6755314   | 0.49                         | 0.17                         | -                            | 0.09                          | 0.19                          |
| Esrrb                        | gi 124375796 | 0.16                         | 0.08                         | 0.22                         | 0.34                          | 0.20                          |
| Pml                          | gi 9506979   | 0.08                         | 0.08                         | 0.27                         | -                             | 0.11                          |
| Foxp4                        | gi 161016782 | -                            | 0.04                         | 0.37                         | 0.04                          | 0.11                          |
| Ctbp2                        | gi 6753548   | -                            | 0.26                         | 0.23                         | 0.08                          | 0.14                          |
| Dax1                         | gi 6671531   | 0.07                         | 0.14                         | 0.21                         | 0.07                          | 0.12                          |
| Zfp143                       | gi 22902397  | 0.05                         | -                            | 0.1                          | 0.06                          | 0.05                          |
| Klf5                         | gi 31981873  | -                            | 0.07                         | 0.14                         | 0.07                          | 0.07                          |
| <b>Other</b>                 |              |                              |                              |                              |                               |                               |
| Rif1                         | gi 47078460  | 0.43                         | 0.82                         | 0.63                         | 0.43(0.16)                    | 0.58                          |
| L1td1                        | gi 148698953 | 0.12                         | 0.23                         | 0.36(0.28)                   | 0.13(0.04)                    | 0.21                          |
| Akap8                        | gi 31560394  | 0.05                         | 0.21                         | 0.3                          | 0.21                          | 0.19                          |
| Msh2                         | gi 30047836  | 0.15                         | 0.11                         | 0.29                         | 0.04                          | 0.15                          |
| Smc1a                        | gi 123220915 | 0.04                         | 0.26                         | 0.1                          | -                             | 0.10                          |
| Ogt                          | gi 13775066  | 0.06                         | 0.1                          | 0.58(0.06)                   | -                             | 0.19                          |
| Rbm14                        | gi 16307494  | 0.12                         | 0.05                         | 0.55(0.05)                   | 0.11                          | 0.21                          |
| Frg1                         | gi 17376286  | 0.27                         | 1.07                         | 0.57                         | 0.27                          | 0.55                          |
| Emsy                         | gi 124249084 | 0.07                         | 0.05                         | 0.19                         | -                             | 0.08                          |
| 0610010K14Rik                | gi 81917220  | 0.53                         | 0.53                         | 1.48                         | -                             | 0.64                          |
| 2810474O19Rik                | gi 148678819 | 0.02                         | 0.09                         | 0.08                         | -                             | 0.05                          |
| Zcchc8                       | gi 148687677 | 0.11                         | 0.05                         | 0.14                         | -                             | 0.08                          |

<sup>a</sup> emPAI score for the specified protein in the Oct4 sample. emPAI score for the specified protein in the corresponding control purification, if present, is between brackets.

**Table S2. Sall4-interacting proteins as identified by mass spectrometry analysis of purified F-Sall4 samples**

| Protein                      | Accession    | Flag#1<br>-Dox      |                    | Flag#2<br>+Dox      |                    | Flag#3<br>-Dox      |                    | Flag#4<br>+Dox      |                    | -Dox | +Dox |
|------------------------------|--------------|---------------------|--------------------|---------------------|--------------------|---------------------|--------------------|---------------------|--------------------|------|------|
|                              |              | Mascot <sup>a</sup> | Pept. <sup>b</sup> | Mascot <sup>a</sup> | Pept. <sup>b</sup> | Mascot <sup>a</sup> | Pept. <sup>b</sup> | Mascot <sup>a</sup> | Pept. <sup>b</sup> |      |      |
| <b>Sall4</b>                 | gi 117553631 | 3978(70)            | 44(1)              | 3991(330)           | 43(4)              | 4530(321)           | 50(4)              | 4378(295)           | 48(4)              | 4254 | 4185 |
| <b>NuRD complex</b>          |              |                     |                    |                     |                    |                     |                    |                     |                    |      |      |
| Chd4                         | gi 39204553  | 3716                | 54                 | 4645                | 68                 | 6021                | 80                 | 5230                | 74                 | 4867 | 4938 |
| Gatad2a                      | gi 148696823 | 1896                | 21                 | 1967                | 24                 | 2055                | 23                 | 2107                | 25                 | 1976 | 2037 |
| Mta2                         | gi 51491880  | 1717                | 22                 | 1803                | 24                 | 1930                | 26                 | 1945                | 28                 | 1824 | 1874 |
| Mta1                         | gi 86577662  | 1423                | 20                 | 1575                | 22                 | 1727                | 25                 | 1610                | 23                 | 1575 | 1593 |
| Gatad2b                      | gi 21314854  | 1412                | 16                 | 1503                | 18                 | 1598                | 18                 | 1531                | 17                 | 1505 | 1517 |
| Mta3                         | gi 18381007  | 1336                | 16                 | 1321                | 16                 | 1479                | 19                 | 1421                | 17                 | 1408 | 1371 |
| Mbd3                         | gi 7305261   | 1147                | 16                 | 915                 | 12                 | 1112                | 13                 | 1044                | 12                 | 1130 | 980  |
| Hdac1                        | gi 2347180   | 1144                | 14                 | 1316                | 16                 | 1586(200)           | 20(3)              | 1425(161)           | 18(2)              | 1365 | 1371 |
| Hdac2                        | gi 87162464  | 1002                | 13                 | 1055                | 14                 | 1336                | 18                 | 1109                | 15                 | 1169 | 1082 |
| Rbbp4                        | gi 5032027   | 888(120)            | 11(3)              | 934(62)             | 12(1)              | 1222(295)           | 15(5)              | 1311(241)           | 16(4)              | 1055 | 1123 |
| Rbbp7                        | gi 157909799 | 709                 | 11                 | 967                 | 13                 | 1222                | 16                 | 1156                | 15                 | 966  | 1062 |
| Mbd2                         | gi 7706609   | 477                 | 7                  | 371                 | 5                  | 601                 | 8                  | 386                 | 5                  | 539  | 379  |
| <b>SWI/SNF complex</b>       |              |                     |                    |                     |                    |                     |                    |                     |                    |      |      |
| Act6a                        | gi 4001805   | 427(128)            | 6(2)               | 606(86)             | 8(1)               | 653(211)            | 8(3)               | 628(88)             | 8(1)               | 540  | 617  |
| Smarcc1                      | gi 30851572  | 239(43)             | 4(1)               | 509                 | 10                 | 409(81)             | 8(3)               | 304(55)             | 6(1)               | 324  | 407  |
| Smarca1                      | gi 576884    | 211                 | 5                  | 326                 | 7                  | 165                 | 3                  | 81                  | 2                  | 188  | 204  |
| Arid1a                       | gi 124249109 | 158                 | 2                  | 129                 | 2                  | 92                  | 1                  | -                   | -                  | 125  | 65   |
| Smarcb1                      | gi 6755578   | 68                  | 1                  | 76                  | 1                  | 174                 | 2                  | 60                  | 1                  | 121  | 68   |
| Smarca4                      | gi 76253779  | 55                  | 2                  | 254                 | 5                  | 50                  | 2                  | 116                 | 2                  | 53   | 185  |
| <b>Transcription factors</b> |              |                     |                    |                     |                    |                     |                    |                     |                    |      |      |
| Sall1                        | gi 14164331  | 1978                | 26                 | 1986                | 27                 | 3094                | 38                 | 2535                | 34                 | 2536 | 2261 |
| Bend3                        | gi 39841055  | 1585                | 23                 | 1386                | 20                 | 2339                | 30                 | 1966                | 27                 | 1962 | 1676 |
| Zfp219                       | gi 47940209  | 730                 | 9                  | 543                 | 6                  | 677                 | 9                  | 294                 | 4                  | 704  | 419  |
| Nac1                         | gi 81886163  | 417                 | 6                  | 423                 | 6                  | 988                 | 12                 | 556                 | 8                  | 703  | 490  |
| Ruvb12                       | gi 6755382   | 330(76)             | 6(1)               | 362(78)             | 5(1)               | 950(139)            | 12(2)              | 557(355)            | 8(6)               | 640  | 460  |
| Wdr5                         | gi 16554627  | 329                 | 4                  | 230                 | 4                  | 683                 | 10                 | 645                 | 11                 | 506  | 437  |
| Oct4                         | gi 53501     | 334                 | 4                  | -                   | -                  | 318                 | 4                  | -                   | -                  | 326  | -    |
| Grhl2                        | gi 46810275  | 109                 | 2                  | 105                 | 2                  | 427                 | 7                  | 293                 | 6                  | 268  | 199  |
| Sall3                        | gi 49257163  | 521                 | 7                  | -                   | -                  | 580                 | 7                  | -                   | -                  | 551  | -    |
| Cxxc5                        | gi 19526854  | 132                 | 2                  | 230                 | 3                  | 287                 | 4                  | 449                 | 5                  | 210  | 340  |
| Zfp143                       | gi 81908410  | 185                 | 4                  | 164                 | 3                  | 202                 | 4                  | 140                 | 3                  | 194  | 152  |
| Tcfcp2                       | gi 15628025  | 82                  | 2                  | -                   | -                  | 277                 | 3                  | 163                 | 2                  | 180  | 82   |
| Sall2                        | gi 49087134  | 145                 | 2                  | 157                 | 2                  | 164                 | 2                  | 172                 | 3                  | 155  | 165  |
| Klf5                         | gi 31981873  | 90                  | 1                  | 105                 | 1                  | 194                 | 2                  | -                   | -                  | 142  | 53   |
| Ctbp2                        | gi 2909779   | 123                 | 3                  | 62                  | 1                  | 99                  | 2                  | 98                  | 2                  | 111  | 80   |
| Zbtb2                        | gi 85701993  | 76                  | 2                  | -                   | -                  | 141                 | 2                  | 54                  | 1                  | 109  | 27   |
| Requiem                      | gi 6755314   | 106                 | 1                  | 208                 | 2                  | 109                 | 1                  | -                   | -                  | 108  | 104  |
| Ewsr1                        | gi 88853581  | 129                 | 2                  | 132                 | 2                  | 82                  | 1                  | -                   | -                  | 106  | 66   |
| Esrrb                        | gi 6166153   | 60                  | 1                  | -                   | -                  | 141                 | 2                  | -                   | -                  | 101  | -    |
| <b>Other</b>                 |              |                     |                    |                     |                    |                     |                    |                     |                    |      |      |
| Usp9x                        | gi 115511018 | 203                 | 2                  | 158                 | 2                  | 1064                | 19                 | -                   | -                  | 634  | 79   |
| 7420416P09Rik                | gi 76253890  | 260                 | 5                  | -                   | -                  | 660                 | 11                 | 413                 | 6                  | 460  | 207  |
| Set                          | gi 123295280 | 431                 | 6                  | -                   | -                  | 298                 | 4                  | 161                 | 2                  | 365  | 81   |
| L1td1                        | gi 148698953 | 93                  | 1                  | 105                 | 1                  | 456                 | 6                  | 76                  | 1                  | 275  | 91   |

<sup>a</sup> Mascot score for the specified protein in the F-Sall4 sample. Mascot score for the specified protein in the corresponding control purification, if present, is between brackets.

<sup>b</sup> Number of identified unique, non-redundant peptides for the specified protein in the F-Sall4 sample. Number of identified unique peptides in the control purification is between brackets.

**Table S2, related to Figure 2**

**Table S3. Dax1-interacting proteins as identified by mass spectrometry analysis of purified F-Dax1 samples**

| Protein                      | Accession    | Flag#1<br>-Dox      |                    | Flag#2<br>+Dox      |                    | Flag#3<br>-Dox      |                    | Flag#4<br>+Dox      |                    | -Dox | +Dox |
|------------------------------|--------------|---------------------|--------------------|---------------------|--------------------|---------------------|--------------------|---------------------|--------------------|------|------|
|                              |              | Mascot <sup>a</sup> | Pept. <sup>b</sup> | Mascot <sup>a</sup> | Pept. <sup>b</sup> | Mascot <sup>a</sup> | Pept. <sup>b</sup> | Mascot <sup>a</sup> | Pept. <sup>b</sup> |      |      |
| <b>Dax1 (Nr0b1)</b>          | gi 6671531   | 928                 | 15                 | 860                 | 10                 | 736                 | 12                 | 711                 | 12                 | 832  | 786  |
| <b>Transcription factors</b> |              |                     |                    |                     |                    |                     |                    |                     |                    |      |      |
| Sall4                        | gi 117553631 | 932(245)            | 15(5)              | 646(124)            | 9(2)               | 729(204)            | 12(4)              | 894(227)            | 16(4)              | 831  | 770  |
| Esrrb                        | gi 6166153   | 332                 | 5                  | 163                 | 5                  | 195                 | 6                  | 55                  | 2                  | 264  | 109  |
| Snw1                         | gi 146149191 | 161                 | 3                  | -                   | -                  | 251                 | 5                  | 292                 | 5                  | 206  | 146  |
| Sall1                        | gi 14164331  | 162                 | 2                  | -                   | -                  | 158                 | 4                  | 309                 | 7                  | 160  | 155  |
| Wdr5                         | gi 16554627  | 130                 | 2                  | 90                  | 1                  | 161                 | 3                  | 65                  | 2                  | 146  | 78   |
| Oct4                         | gi 200118    | 148                 | 2                  | -                   | -                  | 123                 | 2                  | -                   | -                  | 136  | -    |
| Prmt1                        | gi 30185908  | 57                  | 1                  | -                   | -                  | 55                  | 1                  | 80                  | 2                  | 56   | 40   |
| <b>Other</b>                 |              |                     |                    |                     |                    |                     |                    |                     |                    |      |      |
| Rif1                         | gi 47078460  | 105                 | 2                  | -                   | -                  | 358                 | 7                  | 581                 | 11                 | 232  | 291  |
| Ogt                          | gi 13775066  | 200                 | 3                  | 164                 | 3                  | 201                 | 4                  | 211                 | 4                  | 201  | 188  |

<sup>a, b</sup> Equivalent to Table S2.

**Table S3, related to Figure 2**





**Table S6. Sall4-interacting proteins: emPAI scores**

| Protein                      | Accession    | Flag#1             | Flag#2             | Flag#3             | Flag#4             | -Dox          | +Dox  |
|------------------------------|--------------|--------------------|--------------------|--------------------|--------------------|---------------|-------|
|                              |              | -Dox               | +Dox               | -Dox               | +Dox               | Average emPAI |       |
|                              |              | emPAI <sup>a</sup> | emPAI <sup>a</sup> | emPAI <sup>a</sup> | emPAI <sup>a</sup> |               |       |
| <b>Sall4</b>                 | gi 117553631 | 20.62(0.04)        | 17.72(0.18)        | 32.85(0.18)        | 20.65(0.13)        | 26.74         | 19.18 |
| <b>NuRD complex</b>          |              |                    |                    |                    |                    |               |       |
| Chd4                         | gi 39204553  | 1.78               | 3.24               | 7.52               | 4.6                | 4.65          | 3.92  |
| Gatad2a                      | gi 148696823 | 5.02               | 4.74               | 5.03               | 6                  | 5.03          | 5.37  |
| Mta2                         | gi 51491880  | 2.99               | 3.18               | 3.37               | 3.57               | 3.18          | 3.38  |
| Mta1                         | gi 86577662  | 1.64               | 2.28               | 2.89               | 2.57               | 2.27          | 2.43  |
| Gatad2b                      | gi 21314854  | 2.43               | 2.62               | 3.68               | 3                  | 3.06          | 2.81  |
| Mta3                         | gi 18381007  | 2.51               | 2.04               | 3.6                | 3.34               | 3.06          | 2.69  |
| Mbd3                         | gi 7305261   | 9.72               | 4.22               | 8.69               | 6.1                | 9.21          | 5.16  |
| Hdac1                        | gi 2347180   | 5.54               | 7.88               | 18.54(0.2)         | 8.42(0.2)          | 12.04         | 8.15  |
| Hdac2                        | gi 87162464  | 3.52               | 3.81               | 8.93               | 5.12               | 6.23          | 4.47  |
| Rbbp4                        | gi 5032027   | 1.63(0.21)         | 1.64(0.07)         | 2.2(0.29)          | 3.42(0.3)          | 1.92          | 2.53  |
| Rbbp7                        | gi 157909799 | 1.66               | 1.86               | 3.67               | 4.37               | 2.67          | 3.12  |
| Mbd2                         | gi 7706609   | 0.58               | 0.36               | 1.15               | 0.47               | 0.87          | 0.42  |
| <b>SWI/SNF complex</b>       |              |                    |                    |                    |                    |               |       |
| Actl6a                       | gi 4001805   | 0.42(0.14)         | 0.75(0.07)         | 1.02(0.23)         | 0.88(0.07)         | 0.72          | 0.82  |
| Smarcc1                      | gi 30851572  | 0.09(0.03)         | 0.29               | 0.18(0.04)         | 0.15(0.03)         | 0.14          | 0.22  |
| Smarcd1                      | gi 576884    | 0.29               | 0.47               | 0.21               | 0.14               | 0.25          | 0.31  |
| Arid1a                       | gi 124249109 | 0.03               | 0.03               | 0.02               | 0.02               | 0.03          | 0.03  |
| Smarcb1                      | gi 6755578   | 0.08               | 0.08               | 0.16               | 0.08               | 0.12          | 0.08  |
| Smarca4                      | gi 76253779  | 0.02               | 0.08               | 0.02               | 0.04               | 0.02          | 0.06  |
| <b>Transcription factors</b> |              |                    |                    |                    |                    |               |       |
| Sall1                        | gi 14164331  | 1.05               | 1.15               | 2.2                | 1.6                | 1.62          | 1.38  |
| Bend3                        | gi 39841055  | 1.18               | 1.11               | 3.3                | 2.23               | 2.24          | 1.67  |
| Zfp219                       | gi 47940209  | 0.6                | 0.37               | 0.52               | 0.23               | 0.56          | 0.3   |
| Nac1                         | gi 81886163  | 0.34               | 0.42               | 1.03               | 0.6                | 0.69          | 0.51  |
| Ruvbl2                       | gi 6755382   | 0.48(0.07)         | 0.39(0.07)         | 1.2(0.14)          | 0.69               | 0.84          | 0.54  |
| Wdr5                         | gi 16554627  | 0.57               | 0.57               | 1.46               | 1.46               | 1.02          | 1.02  |
| Oct4                         | gi 53501     | 0.45               | -                  | 0.45               | -                  | 0.45          | -     |
| Grhl2                        | gi 46810275  | 0.1                | 0.1                | 0.33               | 0.37               | 0.22          | 0.24  |
| Sall3                        | gi 49257163  | 0.26               | -                  | 0.23               | -                  | 0.25          | -     |
| Cxxc5                        | gi 19526854  | 0.22               | 0.35               | 0.65               | 0.85               | 0.44          | 0.6   |
| Zfp143                       | gi 81908410  | 0.16               | 0.16               | 0.32               | 0.22               | 0.24          | 0.19  |
| Tcfcp2                       | gi 15628025  | 0.06               | -                  | 0.19               | 0.12               | 0.13          | 0.06  |
| Sall2                        | gi 49087134  | 0.13               | 0.1                | 0.1                | 0.1                | 0.12          | 0.1   |
| Klf5                         | gi 31981873  | 0.07               | 0.07               | 0.14               | -                  | 0.11          | 0.04  |
| Ctbp2                        | gi 2909779   | 0.16               | 0.08               | 0.16               | 0.16               | 0.16          | 0.12  |
| Zbtb2                        | gi 85701993  | 0.12               | -                  | 0.12               | 0.06               | 0.12          | 0.03  |
| Requiem                      | gi 6755314   | 0.08               | 0.17               | 0.08               | -                  | 0.08          | 0.09  |
| Ewsr1                        | gi 88853581  | 0.1                | 0.1                | 0.05               | -                  | 0.08          | 0.05  |
| Esrb                         | gi 6166153   | 0.07               | -                  | 0.15               | -                  | 0.11          | -     |
| <b>Other</b>                 |              |                    |                    |                    |                    |               |       |
| Usp9x                        | gi 115511018 | 0.02               | 0.02               | 0.23               | -                  | 0.13          | 0.01  |
| 7420416P09Rik                | gi 76253890  | 0.13               | -                  | 0.38               | 0.27               | 0.26          | 0.14  |
| Set                          | gi 123295280 | 0.65               | -                  | 0.37               | 0.23               | 0.51          | 0.12  |
| L1td1                        | gi 148698953 | 0.04               | 0.04               | 0.2                | 0.04               | 0.12          | 0.04  |

<sup>a</sup> emPAI score for the specified protein in the F-Sall4 sample. emPAI score for the specified protein in the corresponding control purification, if present, is between brackets.

Table S6, related to Figure 2

**Table S7. Dax1-interacting proteins: emPAI scores**

| Protein                      | Accession    | Flag#1             | Flag#2             | Flag#3             | Flag#4             | -Dox          | +Dox |
|------------------------------|--------------|--------------------|--------------------|--------------------|--------------------|---------------|------|
|                              |              | -Dox               | +Dox               | -Dox               | +Dox               |               |      |
|                              |              | emPAI <sup>a</sup> | emPAI <sup>a</sup> | emPAI <sup>a</sup> | emPAI <sup>a</sup> | Average emPAI |      |
| <b>Dax1 (Nr0b1)</b>          | gi 6671531   | 1.12               | 1.26               | 1.56               | 1.57               | 1.34          | 1.42 |
| <b>Transcription factors</b> |              |                    |                    |                    |                    |               |      |
| Sall4                        | gi 117553631 | 0.56(0.18)         | 0.52(0.09)         | 0.43(0.13)         | 0.61(0.13)         | 0.5           | 0.57 |
| Esrrb                        | gi 6166153   | 0.51               | 0.15               | 0.51               | 0.07               | 0.51          | 0.11 |
| Snw1                         | gi 146149191 | 0.12               | -                  | 0.25               | 0.25               | 0.19          | 0.13 |
| Sall1                        | gi 14164331  | 0.05               | -                  | 0.07               | 0.18               | 0.06          | 0.09 |
| Wdr5                         | gi 16554627  | 0.34               | 0.16               | 0.56               | 0.35               | 0.45          | 0.26 |
| Oct4                         | gi 200118    | 0.2                | -                  | 0.2                | -                  | 0.2           | -    |
| Prmt1                        | gi 30185908  | 0.08               | -                  | 0.08               | 0.08               | 0.08          | 0.04 |
|                              |              |                    |                    |                    |                    |               |      |
| Rif1                         | gi 47078460  | 0.03               | -                  | 0.08               | 0.14               | 0.06          | 0.07 |
| Ogt                          | gi 13775066  | 0.09               | 0.09               | 0.12               | 0.09               | 0.11          | 0.09 |

<sup>a</sup> equivalent to Table S6.

Table S7, related to Figure 2



Table S8. Tcfcp21-interacting proteins: emPAI scores

| Protein                      | Accession    | Flag#1      | Flag#2     | Flag#3     | Flag#4     | Average emPAI |       |
|------------------------------|--------------|-------------|------------|------------|------------|---------------|-------|
|                              |              | -Dox        | +Dox       | -Dox       | +Dox       | -Dox          | +Dox  |
|                              |              | emPAI *     | emPAI *    | emPAI *    | emPAI *    |               |       |
| <b>Tcfcp21</b>               | gi 134053939 | 13.57(0.06) | 14.48(0.2) | 19.04      | 14.53      | 16.31         | 14.51 |
| <b>NuRD complex</b>          |              |             |            |            |            |               |       |
| Chd4                         | gi 39204553  | 0.89        | 0.95       | 1.7        | 0.95       | 1.30          | 0.95  |
| Gatad2a                      | gi 30795222  | 1.71        | 1.11       | 1.58       | 0.91       | 1.65          | 1.01  |
| Mta1                         | gi 15077051  | 0.89        | 0.89       | 1.24       | 0.24       | 1.07          | 0.57  |
| Mta2                         | gi 51491880  | 0.63        | 0.63       | 1.14       | 0.14       | 0.89          | 0.39  |
| Gatad2b                      | gi 21314854  | 1.16        | 0.76       | 1.06       | 0.17       | 1.11          | 0.47  |
| Hdac1                        | gi 2347180   | 2.56(0.2)   | 2.79(0.2)  | 1.49       | 0.83       | 2.03          | 1.81  |
| Rbbp7                        | gi 157909799 | 1.31        | 1.15       | 1.71       | 1.32       | 1.51          | 1.24  |
| Hdac2                        | gi 3023934   | 2.14        | 1.33       | 1.19       | 0.72       | 1.67          | 1.03  |
| Mta3                         | gi 18381007  | 0.87        | 0.35       | 0.42       | 0.1        | 0.65          | 0.23  |
| Mbd3                         | gi 7305261   | 1.28        | 1.28       | 1.81       | 0.86       | 1.55          | 1.07  |
| Mbd2                         | gi 7706609   | 0.14        | -          | 0.08       | -          | 0.11          | -     |
| <b>Trrap/p400 complex</b>    |              |             |            |            |            |               |       |
| Trrap                        | gi 124486949 | 0.22        | 0.23       | 0.33       | 0.24       | 0.28          | 0.24  |
| Ruvbi2                       | gi 6755382   | 1.86(0.14)  | 2.05(0.39) | 3.54(0.07) | 3.24(0.07) | 2.70          | 2.65  |
| Ep400                        | gi 27348237  | 0.19        | 0.15       | 0.15       | 0.12       | 0.17          | 0.14  |
| Ruvbl1                       | gi 9790083   | 1.38(0.14)  | 2.31(0.22) | 2.33(0.22) | 0.82(0.22) | 1.86          | 1.57  |
| Actl6a                       | gi 4001805   | 1.16(0.23)  | 1.32(0.07) | 0.64(0.14) | 1.16(0.07) | 0.90          | 1.24  |
| Yeats4                       | gi 13386064  | 1.23        | 1.61       | 1.13       | 0.87       | 1.18          | 1.24  |
| Vps72                        | gi 83921607  | 0.51        | 0.18       | 0.28       | 0.28       | 0.40          | 0.23  |
| Dmap1                        | gi 12963557  | 0.29        | 0.37       | 0.21       | 0.29       | 0.25          | 0.33  |
| Brd8                         | gi 19344050  | 0.07        | 0.03       | 0.07       | -          | 0.07          | 0.02  |
| Ing3                         | gi 17390799  | 0.08        | -          | 0.08       | 0.08       | 0.08          | 0.04  |
| 1600027Rik                   | gi 110625965 | 0.15        | -          | 0.34       | 0.34       | 0.25          | 0.17  |
| <b>SWI/SNF complex</b>       |              |             |            |            |            |               |       |
| Smarcc1                      | gi 30851572  | 1.39(0.04)  | 1.32(0.03) | 1.46(0.03) | 0.31       | 1.43          | 0.82  |
| Smarca4                      | gi 76253779  | 0.23        | 0.23       | 0.51       | 0.23       | 0.37          | 0.23  |
| And1a                        | gi 124249109 | 0.18        | 0.17       | 0.23       | 0.17       | 0.21          | 0.17  |
| Actl6a                       | gi 4001805   | 1.16(0.23)  | 1.32(0.07) | 0.64(0.14) | 1.16(0.07) | 0.90          | 1.24  |
| Smarcc2                      | gi 38565930  | 0.28        | -          | 0.4        | -          | 0.34          | -     |
| Smarce1                      | gi 10181166  | 0.54(0.07)  | 0.54       | 0.44       | 0.43       | 0.49          | 0.49  |
| Smarcd1                      | gi 1549249   | 0.29        | 0.54       | 0.67       | 0.36       | 0.48          | 0.45  |
| Smarcb1                      | gi 6755578   | 0.35        | 0.25       | 0.47       | 0.35       | 0.41          | 0.30  |
| Smarcd2                      | gi 57013098  | 0.07        | 0.14       | 0.21       | 0.07       | 0.14          | 0.11  |
| <b>PRC1/mblr complex</b>     |              |             |            |            |            |               |       |
| Rnf2                         | gi 33563274  | 0.42        | 0.19       | 0.3        | 0.42       | 0.36          | 0.31  |
| Phc1                         | gi 1490546   | 0.1         | 0.1        | 0.07       | 0.03       | 0.09          | 0.07  |
| Mblr (Pcgf6)                 | gi 28076973  | 0.18        | 0.18       | 0.18       | 0.09       | 0.18          | 0.14  |
| Rybp                         | gi 5381327   | 0.14        | 0.5        | 0.14       | -          | 0.14          | 0.25  |
| <b>Transcription factors</b> |              |             |            |            |            |               |       |
| Sall4                        | gi 81913723  | 3.25(0.18)  | 2.35(0.18) | 3.95(0.04) | 1.22(0.18) | 3.60          | 1.79  |
| Ubp1                         | gi 134032032 | 6           | 8.77       | 7.32       | 4.31       | 6.66          | 6.54  |
| Tcfcp2                       | gi 15628025  | 1.14        | 1.71       | 1.72       | 1.41       | 1.43          | 1.56  |
| Lsd1                         | gi 51315882  | 0.37        | 0.53       | 0.58       | 0.11       | 0.48          | 0.32  |
| Sall1                        | gi 14164331  | 0.33        | 0.3        | 0.24       | 0.15       | 0.29          | 0.23  |
| Esrrb                        | gi 28277057  | 1.61        | 5.36       | 1.13       | 1.61       | 1.37          | 3.49  |
| Smarca5                      | gi 14028669  | 0.28        | 0.25       | 0.25       | 0.03       | 0.27          | 0.14  |
| Wdr5                         | gi 16554627  | 0.72        | 0.88       | 1.25       | 1.46       | 0.99          | 1.17  |
| Peg10                        | gi 98985814  | 0.38(0.08)  | 0.38       | 0.26       | 0.19       | 0.32          | 0.29  |
| Yeats2                       | gi 84794613  | 0.21        | 0.09       | 0.13       | -          | 0.17          | 0.05  |
| Hcfc1                        | gi 34328130  | 0.1         | 0.1        | 0.17       | 0.03       | 0.14          | 0.07  |
| Zmym4                        | gi 167555112 | 0.08        | 0.1        | 0.19       | 0.08       | 0.14          | 0.09  |
| Hells                        | gi 12232371  | 0.15        | 0.11       | 0.24       | 0.07       | 0.20          | 0.09  |
| Mga                          | gi 120444914 | 0.06        | 0.04       | 0.1        | 0.01       | 0.08          | 0.03  |
| Zfp462                       | gi 85740499  | 0.15        | 0.17       | 0.02       | 0.01       | 0.09          | 0.09  |
| Oct4                         | gi 125490392 | 0.45        | -          | 0.45       | -          | 0.45          | -     |
| Requiem                      | gi 6648956   | 0.36        | 0.26       | 0.37       | 0.17       | 0.37          | 0.22  |
| Pogz                         | gi 111598687 | 0.14        | 0.14       | 0.03       | -          | 0.09          | 0.07  |
| Zfp143                       | gi 121247390 | 0.28        | 0.16       | 0.28       | 0.17       | 0.28          | 0.17  |
| Sin3a                        | gi 726286    | 0.1         | 0.12       | 0.1        | -          | 0.10          | 0.06  |
| Hnrnpab                      | gi 6754222   | 0.54        | 0.38       | 0.24       | 0.91       | 0.39          | 0.65  |
| Wiz                          | gi 46909565  | 0.07        | 0.02       | 0.17       | 0.02       | 0.13          | 0.02  |
| Adnp                         | gi 55930867  | 0.12        | 0.12       | 0.12       | 0.04       | 0.12          | 0.08  |
| Satb2                        | gi 20982839  | 0.23        | 0.08       | 0.18       | 0.13       | 0.21          | 0.11  |
| Klf5                         | gi 31981873  | 0.22        | 0.14       | 0.22       | 0.07       | 0.22          | 0.11  |
| Trim33                       | gi 119637828 | 0.03        | 0.12       | 0.11       | 0.06       | 0.07          | 0.09  |
| Mybl2                        | gi 6678974   | 0.14        | 0.14       | 0.09       | 0.09       | 0.12          | 0.12  |
| Bptf                         | gi 123241372 | 0.02        | 0.01       | 0.03       | -          | 0.03          | 0.01  |
| Grhl2                        | gi 46810275  | 0.3         | 0.07       | 0.14       | -          | 0.22          | 0.04  |
| L3mbtl2                      | gi 27734414  | 0.13        | 0.04       | 0.04       | -          | 0.09          | 0.02  |
| Zzz3                         | gi 47847456  | 0.03        | 0.03       | 0.03       | -          | 0.03          | 0.02  |
| Ehmt1                        | gi 34784556  | 0.12        | -          | 0.03       | -          | 0.08          | -     |
| Zfp828                       | gi 32469497  | 0.05        | -          | 0.08       | -          | 0.07          | -     |
| <b>Other</b>                 |              |             |            |            |            |               |       |
| Rif1                         | gi 47078460  | 0.32        | 0.34       | 0.48       | 0.29       | 0.40          | 0.32  |
| Zcchc8                       | gi 169808385 | 0.6         | 0.75       | 0.83       | -          | 0.72          | 0.38  |
| Supt16h                      | gi 15637171  | 0.18        | 0.18       | 0.25       | 0.12       | 0.22          | 0.15  |
| Lig3                         | gi 3913496   | 0.27        | 0.27       | 0.23       | 0.13       | 0.25          | 0.20  |
| Ogt                          | gi 27499606  | 0.22        | 0.15       | 0.22       | -          | 0.22          | 0.08  |
| Xrcc6                        | gi 145587104 | 0.27        | 0.27       | 0.42       | 0.06       | 0.35          | 0.17  |
| Xrcc5                        | gi 22137748  | 0.18        | 0.33       | 0.27       | 0.08       | 0.23          | 0.21  |
| C130039O16Rik                | gi 148670819 | 0.16        | 0.13       | 0.10       | 0.10       | 0.13          | 0.12  |
| Msh2                         | gi 726086    | 0.17        | 0.17       | 0.25       | -          | 0.21          | 0.09  |
| L1td1                        | gi 124487095 | 0.21        | 0.3        | 0.12       | 0.08       | 0.17          | 0.19  |
| Msh6                         | gi 6754744   | 0.12        | 0.02       | 0.07       | -          | 0.10          | 0.01  |
| Rbm14                        | gi 86262142  | 0.1         | 0.16       | 0.21       | -          | 0.16          | 0.08  |
| Xrcc1                        | gi 55391482  | 0.16        | 0.05       | 0.22       | 0.1        | 0.19          | 0.08  |
| Potb                         | gi 21729749  | 0.55        | 0.42       | 0.3        | 0.25       | 0.43          | 0.34  |
| EMSY                         | gi 124249084 | 0.08        | 0.11       | 0.08       | 0.11       | 0.08          | 0.11  |
| Rpa1                         | gi 18390321  | 0.1         | -          | 0.16       | -          | 0.13          | -     |
| Prkdc                        | gi 124517706 | 0.01        | -          | 0.01       | -          | 0.01          | -     |
| 4632411B12Rik                | gi 37360322  | 0.07        | 0.04       | 0.04       | -          | 0.06          | 0.02  |
| Akap8                        | gi 5931618   | 0.09        | 0.09       | 0.05       | -          | 0.07          | 0.05  |
| Pnkp                         | gi 7108591   | 0.13        | -          | 0.12       | 0.06       | 0.13          | 0.03  |
| Asf1a                        | gi 13384964  | 0.15        | 0.15       | 0.15       | 0.15       | 0.15          | 0.15  |
| Cabin1                       | gi 70995287  | 0.04        | -          | 0.07       | -          | 0.06          | -     |
| 2310057J16Rik                | gi 61213696  | 0.03        | 0.1        | 0.03       | -          | 0.03          | 0.05  |
| Ubln4                        | gi 15805016  | 0.05        | 0.05       | 0.05       | -          | 0.05          | 0.03  |

<sup>a</sup> equivalent to Table S6.

Table S8, related to Figure 2

Table S9. Esrrb-interacting proteins: emPAI scores

| Protein                      | Accession    | Flag#1             | Flag#2             | Flag#3             | Flag#4             | Average emPAI |       |
|------------------------------|--------------|--------------------|--------------------|--------------------|--------------------|---------------|-------|
|                              |              | -Dox               | +Dox               | -Dox               | +Dox               | -Dox          | +Dox  |
|                              |              | emPAI <sup>a</sup> | emPAI <sup>a</sup> | emPAI <sup>a</sup> | emPAI <sup>a</sup> |               |       |
| <b>Esrrb</b>                 | gi 6166153   | 29.49              | 55.48              | 29.03              | 26.16              | 29.26         | 40.82 |
| <b>SWI/SNF complex</b>       |              |                    |                    |                    |                    |               |       |
| Smarcc1                      | gi 30851572  | 0.86(0.03)         | 0.76(0.06)         | 1.01               | 0.48               | 0.94          | 0.62  |
| Arid1a                       | gi 124249109 | 0.06(0.01)         | 0.09               | 0.22               | 0.05               | 0.14          | 0.07  |
| Smarca4                      | gi 76253779  | 0.35               | 0.23               | 0.34               | 0.2                | 0.35          | 0.22  |
| Smarca1                      | gi 1549249   | 0.85               | 0.47               | 0.77               | 0.69               | 0.81          | 0.58  |
| Pbrm1                        | gi 116284015 | 0.07               | 0.03               | 0.13               | 0.07               | 0.10          | 0.05  |
| <b>Trrap/p400 complex</b>    |              |                    |                    |                    |                    |               |       |
| Trrap                        | gi 124486949 | 0.19               | 0.16               | 0.45               | -                  | 0.32          | 0.08  |
| Ep400                        | gi 27348237  | 0.14               | 0.13               | 0.25               | 0.02               | 0.20          | 0.08  |
| Yeats4                       | gi 13386064  | 1.41               | 1.41               | 0.47               | -                  | 0.94          | 0.71  |
| Dmap1                        | gi 12963557  | 0.46               | 0.29               | 0.39               | 0.07               | 0.43          | 0.18  |
| Brd8                         | gi 19344050  | 0.2                | -                  | 0.15               | 0.04               | 0.18          | 0.02  |
| Ing3                         | gi 17390799  | 0.16               | 0.16               | 0.25               | -                  | 0.21          | 0.08  |
| 1600027Rik                   | gi 110625965 | 0.15               | 0.15               | 0.16               | -                  | 0.16          | 0.08  |
| <b>NuRD complex</b>          |              |                    |                    |                    |                    |               |       |
| Chd4                         | gi 39204553  | 0.39               | 0.22               | 0.25               | 0.1                | 0.32          | 0.16  |
| Gatad2a                      | gi 148696823 | 0.42               | 1.12               | 0.67               | 0.71               | 0.55          | 0.92  |
| Mta2                         | gi 51491880  | 0.43               | 0.5                | 0.52               | 0.27               | 0.48          | 0.39  |
| Mta1                         | gi 86577662  | 0.29               | 0.18               | 0.3                | 0.15               | 0.30          | 0.17  |
| Gatad2b                      | gi 21314854  | 0.36               | 0.59               | 0.45               | 0.18               | 0.41          | 0.39  |
| Mta3                         | gi 18381007  | 0.1                | 0.28               | 0.17               | -                  | 0.14          | 0.14  |
| Mbd3                         | gi 7305261   | 0.68               | 0.86               | 0.7                | 0.12               | 0.69          | 0.49  |
| Hdac1                        | gi 2347180   | 1.64(0.2)          | 2.17(0.13)         | 1.26(0.06)         | 1.04               | 1.45          | 1.61  |
| Hdac2                        | gi 87162464  | 0.62               | 0.72               | 1.4(0.06)          | 0.68               | 1.01          | 0.70  |
| Rbbp4                        | gi 5032027   | 0.79(0.14)         | 0.68(0.21)         | 0.49(0.14)         | 0.41(0.3)          | 0.64          | 0.55  |
| <b>Mediator complex</b>      |              |                    |                    |                    |                    |               |       |
| Med14                        | gi 115270972 | 0.77               | 1.17               | 1.06               | 0.75               | 0.92          | 0.96  |
| Med12                        | gi 123226656 | 0.32               | 0.4                | 0.48               | 0.31               | 0.40          | 0.36  |
| Med23                        | gi 61651678  | 0.38               | 0.75               | 0.81               | 0.47               | 0.60          | 0.61  |
| Med24                        | gi 119220579 | 0.73               | 0.73               | 0.74               | 0.45               | 0.74          | 0.59  |
| Med17                        | gi 21450345  | 1.41               | 2.34               | 1.05               | 1.2                | 1.23          | 1.77  |
| Med1                         | gi 14193713  | 0.25               | 0.42               | 0.56               | 0.36               | 0.41          | 0.39  |
| Med16                        | gi 148699683 | 0.83               | 0.69               | 0.54               | 0.51               | 0.59          | 0.60  |
| Med15                        | gi 32451779  | 0.86               | 0.79               | 0.75               | 0.58               | 0.81          | 0.69  |
| Med13                        | gi 124286862 | 0.13               | 0.12               | 0.18               | 0.06               | 0.16          | 0.09  |
| Med27                        | gi 16741439  | 3.94               | 2.74               | 1.16               | 0.98               | 2.55          | 1.86  |
| Med25                        | gi 47940179  | 0.41               | 0.41               | 0.31               | 0.38               | 0.36          | 0.40  |
| Med13l                       | gi 49257394  | 0.1                | 0.12               | 0.14               | 0.08               | 0.12          | 0.10  |
| Med4                         | gi 13385626  | 0.75               | 4.36               | 2.17               | 1.6                | 1.46          | 2.98  |
| Med26                        | gi 28466971  | 0.37               | 0.6                | 0.46               | 0.09               | 0.42          | 0.35  |
| Med6                         | gi 27754027  | 1.79               | 1.41               | 1.13               | 2.48               | 1.46          | 1.95  |
| Med8                         | gi 29366816  | 0.94               | 1.42               | 0.77               | 0.6                | 0.86          | 1.01  |
| Cncc                         | gi 38382739  | 0.43               | 0.88               | 0.45               | 0.1                | 0.44          | 0.49  |
| Med30                        | gi 19882231  | 1.24               | 1.24               | 0.39               | 0.19               | 0.82          | 0.72  |
| Med7                         | gi 157266302 | 0.84               | 0.84               | 0.46               | 0.14               | 0.65          | 0.49  |
| Med29                        | gi 27754101  | 1.17               | 0.86               | 0.38               | 0.39               | 0.78          | 0.63  |
| Cdk8                         | gi 31652272  | 0.13               | 0.07               | 0.14               | 0.14               | 0.14          | 0.11  |
| Med18                        | gi 21313064  | 0.75               | 1.01               | 0.16               | 0.81               | 0.46          | 0.91  |
| Med19                        | gi 28277157  | 0.29               | 1.43               | 0.14               | 0.14               | 0.22          | 0.79  |
| <b>RNAPol2 complex</b>       |              |                    |                    |                    |                    |               |       |
| Polr2a                       | gi 2145091   | 0.22               | 0.21               | 0.27               | 0.2                | 0.25          | 0.21  |
| Polr2b                       | gi 24418911  | 0.26               | 0.22               | 0.52               | 0.31               | 0.39          | 0.27  |
| Polr2c                       | gi 29336059  | 0.69               | 0.69               | 0.39               | 0.25               | 0.54          | 0.47  |
| Polr2g                       | gi 4505947   | 0.19               | 1.34               | 0.69               | 0.2                | 0.44          | 0.77  |
| <b>TFIID complex</b>         |              |                    |                    |                    |                    |               |       |
| Taf9                         | gi 28175808  | 0.41               | 1.23               | 1.58               | 0.13               | 1.00          | 0.68  |
| Taf6                         | gi 6678215   | 0.1                | 0.1                | 0.1                | 0.05               | 0.10          | 0.08  |
| Taf4a                        | gi 123288532 | 0.1                | 0.05               | 0.28               | 0.11               | 0.19          | 0.08  |
| Taf10                        | gi 46518499  | 0.16               | 0.16               | 0.17               | -                  | 0.17          | 0.08  |
| Tbp                          | gi 29477183  | 0.1                | 0.1                | 0.1                | -                  | 0.10          | 0.05  |
| <b>TRX/MLL complex</b>       |              |                    |                    |                    |                    |               |       |
| Wdr5                         | gi 16554627  | 0.72               | 0.72               | 0.59               | 0.47               | 0.66          | 0.60  |
| Hcfc1                        | gi 34328130  | 0.08               | -                  | 0.12               | 0.05               | 0.10          | 0.03  |
| Mll2                         | gi 149266757 | 0.01               | 0.01               | 0.05               | -                  | 0.03          | 0.01  |
| Mll3                         | gi 37999865  | 0.01               | 0.01               | 0.04               | -                  | 0.03          | 0.01  |
| Ash12                        | gi 4009338   | 0.1                | 0.05               | 0.29               | -                  | 0.20          | 0.03  |
| Rbbp5                        | gi 34784634  | 0.06               | 0.06               | 0.19               | -                  | 0.13          | 0.03  |
| <b>Transcription factors</b> |              |                    |                    |                    |                    |               |       |
| Sall4                        | gi 117553631 | 0.92(0.13)         | 0.75(0.13)         | 0.58(0.18)         | 0.56(0.09)         | 0.75          | 0.66  |
| Dax1                         | gi 6671531   | 1.41               | 0.87               | 1.04               | 0.5                | 1.23          | 0.69  |
| Tcfcp2l1                     | gi 90101766  | 0.96               | 0.63               | 1                  | 0.48               | 0.98          | 0.56  |
| Fkbp15                       | gi 38614309  | 0.25               | 0.32               | 0.3                | 0.14               | 0.28          | 0.23  |
| Esrra                        | gi 112293262 | 0.67               | 1.59               | 1.29               | 0.48               | 0.98          | 1.04  |
| Ncoa3                        | gi 118026946 | 0.12               | 0.05               | 0.23               | -                  | 0.18          | 0.03  |
| Ubp1                         | gi 134032032 | 0.48               | 0.71               | 0.5                | 0.07               | 0.49          | 0.39  |
| Nrip1                        | gi 27734110  | 0.17               | 0.45               | 0.25               | 0.37               | 0.21          | 0.41  |
| Sall1                        | gi 14164331  | 0.13               | 0.1                | 0.25               | 0.11               | 0.19          | 0.11  |
| Zfp462                       | gi 148670321 | 0.02               | 0.02               | 0.14               | -                  | 0.08          | 0.01  |
| Cdc2a                        | gi 13542826  | 0.81               | 0.81               | 1.03               | 0.11               | 0.92          | 0.46  |
| Zbtb9                        | gi 54400753  | 0.4                | 0.31               | 0.62               | 0.15               | 0.51          | 0.23  |
| Smarca5                      | gi 14028669  | 0.09               | 0.06               | 0.19               | 0.23               | 0.14          | 0.15  |
| Wiz                          | gi 46909565  | 0.03               | 0.02               | 0.18               | 0.11               | 0.11          | 0.07  |
| Requiem                      | gi 6648956   | 0.17               | 0.26               | 0.36               | 0.09               | 0.27          | 0.18  |
| Jmjd1c                       | gi 149260924 | 0.03               | 0.01               | 0.04               | -                  | 0.04          | 0.01  |
| Tcfcp2                       | gi 15628025  | 0.12               | 0.19               | 0.2                | -                  | 0.16          | 0.10  |
| L3mbtl2                      | gi 27734414  | 0.07               | -                  | 0.16               | 0.05               | 0.12          | 0.03  |
| Oct4                         | gi 125490392 | 0.1                | -                  | 0.33               | -                  | 0.22          | -     |
| Myst1                        | gi 21312790  | 0.07               | 0.07               | 0.14               | -                  | 0.11          | 0.04  |
| Ehmt1                        | gi 34784556  | 0.03               | 0.03               | 0.1                | -                  | 0.07          | 0.02  |
| <b>Other</b>                 |              |                    |                    |                    |                    |               |       |
| Rif1                         | gi 47078460  | 0.39               | 0.26               | 0.41               | 0.06               | 0.40          | 0.16  |
| Ogt                          | gi 27499606  | 0.3                | 0.15               | 0.39               | 0.1                | 0.35          | 0.13  |

<sup>a</sup> equivalent to Table S6.

Table S9, related to Figure 2
